# Supplementary material for: Multimodal Approach to Intraventricular Hemorrhage Using Echocardiography, Near-Infrared Spectroscopy, and Electrical Cardiometry in Preterm Infants
Source: Research Square preprint supplement (doi:10.21203/rs.3.rs-7376716/v1), 2025-08-27
Supplement: Supplementary file 1 [file 09f9f85b981c5ce37c2f791f.xlsx]

## Sheet: Table 1
				P-value
Variable	Overall	No IVH (n=428)	Any IVH
	(n=482)		(n = 54)
Gestational age (weeks), Mean ± SD	28.0 ± 2.0	28.4 ± 2.3	26.2 ± 2.2	< 0.001 *
Birth weight (grams), Mean ± SD	1118 ± 383	1148 ± 381	888 ± 324	< 0.001 *
Antenatal steroid (completed course), n (%)	396 (82%)	355 (83%)	41 (76%)	0.28
Cesarean Section, n (%)	413 (85%)	372 (87%)	41 (76%)	0.03 *
Female, n (%)	247 (51%)	219 (51%)	28 (55%)	0.92
Chorioamnionitis, n (%)	116 (24%)	93 (22%)	23 (43%)	0.001 *
Pregnancy induced hypertension, n (%)	122 (25%)	116 (27%)	6 (11%)	0.01*
IVH Grade 1, n (%)	25 (5.1%)	-	25 (46%)
				-
Moderate IVH Grade 2, n (%)	14 (2.9%)	-	14 (26%)
				-
Severe IVH Grade 3 & 4, n (%)	15 (3.1%)	-	15 (28%)
				-
Death, n (%)	27 (6%)	15 (3.5%)	12 (22%)	< 0.0001 *
Table 1. Maternal and Neonatal Characteristics by IVH Status.
*SD = Standard Deviation; IVH = Intraventricular Hemorrhage.
Indicates statistically significant at p < 0.05. *
