# Supplementary material for: Multimodal Approach to Intraventricular Hemorrhage Using Echocardiography, Near-Infrared Spectroscopy, and Electrical Cardiometry in Preterm Infants
Source: Research Square preprint supplement (doi:10.21203/rs.3.rs-7376716/v1), 2025-08-27
Supplement: Supplementary file 2 [file 4769583bd41e5323762e377a.xlsx]

## Sheet: Supplementary Table 2
Predictor Variable	N	AUC	Cut-off Value	Sensitivity%	Specificity%
GA (weeks)	482	0.83	27.3	85.2	66.8
Mean Arterial Blood Pressure (mmHg)	478	0.68	34.8	77.8	53.2
CO Avg (L/kg/min)	239	0.61	2.5	44.4	88.3
SVC (ml/kg/min)	238	0.6	74	55.6	65.9
LVO (ml/kg/min)	325	0.59	215	52.4	67.1
NIRS time <67%	476	0.59	139	33.3	87.8
NIRS Avg (%)	481	0.55	73.8	29.6	92.5
RVO (ml/kg/min)	330	0.48	210	42.9	69.3
Supplementary Table 2. Summary Results of ROC Analysis for Predictors of Death.
