# Supplementary material for: Multimodal Approach to Intraventricular Hemorrhage Using Echocardiography, Near-Infrared Spectroscopy, and Electrical Cardiometry in Preterm Infants
Source: Research Square preprint supplement (doi:10.21203/rs.3.rs-7376716/v1), 2025-08-27
Supplement: Supplementary file 3 [file 49376da7a54f0d0af1c109e3.xlsx]

## Sheet: Table 4
	Adjusted Odds Ratio (95% CI)	P-value
Any-Grade IVHa
Average/raw measurements set
RVO1	0.96 (0.92, 0.99)	0.03
Severe IVH
Average/raw measurements set
SVC1	0.96 (0.93, 0.99)	0.02
Abnormal time set
Number of minutes NIRS<67%1	1.002 (1.001, 1.003)	0.004
Mortalitya
Average/raw measurements set
MAP2	0.81 (0.68, 0.94)	0.01
SVC3	0.96 (0.92, 0.99)	0.02
Table 4. Adjusted odds ratio on the effect of significant hemodynamic parameters for each primary outcome from a multivariable logistic regression model. CI=Confidence interval. Adjusted by: 1GA, 2GA, SVC, prenatal steroid exposure, 3GA, MAP, prenatal steroid exposure.
aNo significant hemodynamic parameters from abnormal time set.
