# Supplementary material for: Multimodal Approach to Intraventricular Hemorrhage Using Echocardiography, Near-Infrared Spectroscopy, and Electrical Cardiometry in Preterm Infants
Source: Research Square preprint supplement (doi:10.21203/rs.3.rs-7376716/v1), 2025-08-27
Supplement: Supplementary file 4 [file 4ab614c13c16a3871d6ffb43.xlsx]

## Sheet: Table 3
	No Death	Death	OVERALL	P value
Variable	(n=455)	(n=27)	(n=482)
Gestational Age (weeks)	28.3 ± 2.3	25.4 ± 1.7	28.2 ± 2.4	<0.001
Birth Weight (g)	1147 ± 374	656 ± 232	1119 ± 384	<0.001
Mean Arterial Blood Pressure (mmHg)	35.3 ± 9.7	30.1 ± 7.7	35.0 ± 9.7	0.002
Near Infrared Spectroscopy Average (NIRS) (%)	80.3 ± 6.6	80.0 ± 10.0	80.3 ± 6.8	0.35
Cardiac Output Average (ml/kg/min)	243.0 ± 475.0	247.2 ± 100.0	243.2 ± 466.0	0.28
Superior Vena Cava Flow (SVC)	86.7 ± 29.4	73.8 ± 28.2	86.2 ± 29.9	0.3
(ml/kg/min)
Right Ventricular Function (RVO) (ml/kg/min)	253.4 ± 85.6	276.9 ± 143.0	254.9 ± 90.2	0.8
Left Ventricular Function (LVO) (ml/kg/min)	199.0 ± 67.8	219.5 ± 56.9	219.5 ± 56.9	0.046
Table 3. Predictor variables stratified by death (Mean ±SD). P-values for continuous variables come from the Wilcoxon rank-sum test, and for categorical variables from the chi-squared test.
