# Supplementary material for: Multimodal Approach to Intraventricular Hemorrhage Using Echocardiography, Near-Infrared Spectroscopy, and Electrical Cardiometry in Preterm Infants
Source: Research Square preprint supplement (doi:10.21203/rs.3.rs-7376716/v1), 2025-08-27
Supplement: Supplementary file 5 [file 767770202a8b3ab3ed0fcac0.xlsx]

## Sheet: Table 2
	No IVH/	Severe IVH	OVERALL	P value
Variable	Grade 1, 2 IVH	(n=15)	(n=482)
	(n=467)
Gestational Age (weeks)	28.3 ± 2.4	25.4 ± 1.8	28.2 ± 2.4	<0.001
Birth Weight (g)	1131 ± 381	751 ± 250	1119 ± 384	<0.001
Mean Arterial Blood Pressure (mmHg)	35.1 ± 9.7	29.4 ± 6.98	35.0 ± 9.7	0.006
Near Infrared Spectroscopy Average (NIRS) (%)	80.4 ± 6.5	77.6 ± 13.7	80.3 ± 6.8	0.04
Cardiac Output Average (ml/kg/min)	242.5 ± 472	267.9 ± 75.6	243.2 ± 466	0.03
Superior Vena Cava Flow (SVC)	86.9 ± 29.6	61.5 ± 36.8	86.2 ± 29.9	0.1
(ml/kg/min)
Right Ventricular Function (RVO) (ml/kg/min)	252.9 ± 89.9	195.3 ± 82.6	254.9 ± 90.2	0.026
Left Ventricular Function (LVO) (ml/kg/min)	201.7 ± 67.9	160.6 ± 56.9	200.3 ± 67.85	0.046
Table 2. Predictor variables stratified by severe IVH (Mean ±SD). P-values for continuous variables come from the Wilcoxon rank-sum test, and for categorical variables from the chi-squared test.
