# Supplementary material for: Multimodal Approach to Intraventricular Hemorrhage Using Echocardiography, Near-Infrared Spectroscopy, and Electrical Cardiometry in Preterm Infants
Source: Research Square preprint supplement (doi:10.21203/rs.3.rs-7376716/v1), 2025-08-27
Supplement: Supplementary file 6 [file a10c77bb9d8e5777c790d287.xlsx]

## Sheet: Supplementary Table 1
Predictor Variable	N	AUC	Cut-off Value	Sensitivity%	Specificity%
GA (weeks)	482	0.82	27.9	100	57
Mean Arterial Blood Pressure (mmHg)	478	0.72	32.3	78.6	65.5
CO Avg (L/kg/min)	239	0.76	2.65	66.7	90.1
NIRS time <67%	476	0.72	129	60	86.1
NIRS Avg (%)	481	0.66	73.8	60	92.9
SVC (ml/kg/min)	238	0.7	55	50	87.1
RVO (ml/kg/min)	330	0.7	254	90.9	45.5
LVO (ml/kg/min)	325	0.68	132	45.5	86.6
Supplementary Table 1. Summary Results of ROC Analysis for Predictors of IVH.
